# Supplementary material for: iPseU-CNN: Identifying RNA Pseudouridine Sites Using Convolutional Neural Networks
Source: PubMed Central journal article supplement — Mol Ther Nucleic Acids. 2019 Apr 11;16:463–70. doi: 10.1016/j.omtn.2019.03.010 (PMC6488737; doi:10.1016/j.omtn.2019.03.010), 2019-04-11

**OMTN, Volume 16**

**Supplemental Information**

**iPseU-CNN: Identifying RNA Pseudouridine  
Sites Using Convolutional Neural Networks**

**Muhammad Tahir, Hilal Tayara, and Kil To Chong**

## Pseudouridine modification

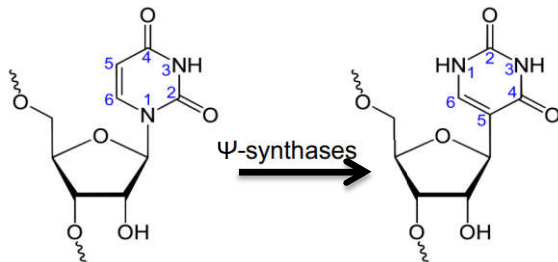

## The proposed deep learning model iPseU-CNN

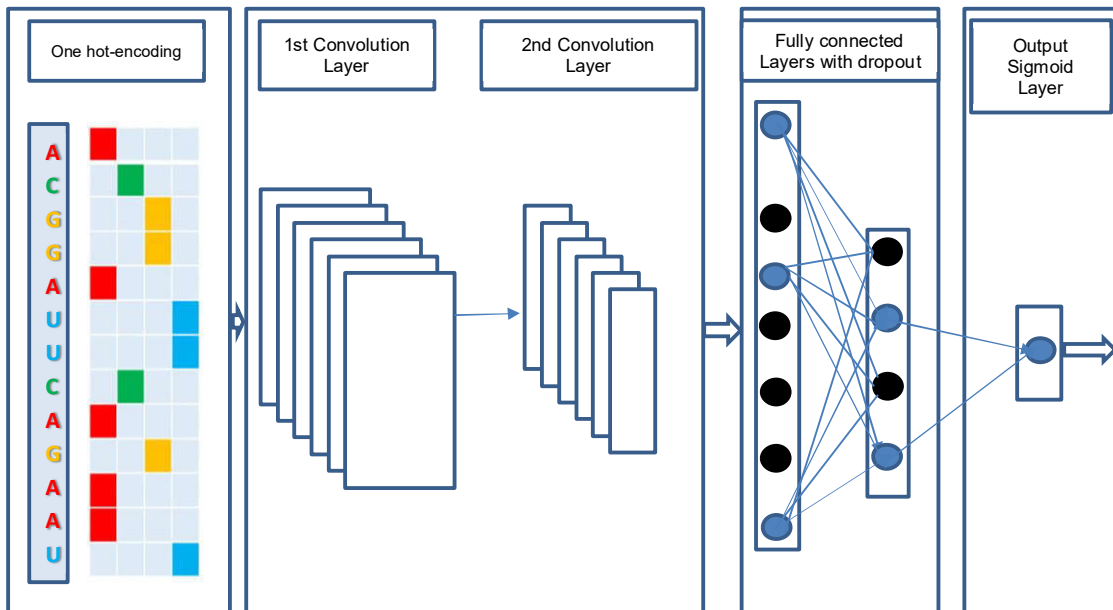

Supplement: mmc1.pdf [file mmc1.pdf]
